# Supplementary material
Source: publisher site journal article supplement (https://www.dovepress.com/article/350454)
Supplement: Supplementary file 1 [file get_supplementary_file.php]

**Table S1**

Clinical characteristics of patients included in this study from four datasets

| Dataset                        | TCGA RNA-Seq | CGGA RNA-Seq_325 | CGGA microarray_301 | REMBRANDT   | GTEX RNA-Seq |
|--------------------------------|--------------|------------------|---------------------|-------------|--------------|
| <b>Formation</b>               |              |                  |                     |             |              |
| Glioma tissue                  | 697          | 325              | 306                 | 381         | 0            |
| Non-tumor tissue               | 5            | 20               | 0                   | 0           | 200          |
| <b>Gender</b>                  |              |                  |                     |             |              |
| Male                           | 288          | 122              | 121                 | 126         |              |
| Female                         | 394          | 203              | 180                 | 221         |              |
| Unavailable                    | 15           | 0                | 5                   | 34          |              |
| <b>Age(years)</b>              |              |                  |                     |             |              |
| Means                          | 60           | 43               | 43                  | Unavailable |              |
| Range                          | 14-89        | 8-81             | 13-70               | Unavailable |              |
| <b>Survival status</b>         |              |                  |                     |             |              |
| Alive                          | 414          | 99               | 100                 | 65          |              |
| Dead                           | 235          | 219              | 187                 | 281         |              |
| Unavailable                    | 48           | 7                | 14                  | 35          |              |
| <b>Overall survival(month)</b> |              |                  |                     |             |              |
| Median                         | 48,6         | 37.37            | 27.47               | 19.93       |              |
| <b>Histology</b>               |              |                  |                     |             |              |
| LGG                            | 512          | 114              | 124                 | 200         |              |
| GBM                            | 151          | 139              | 124                 | 181         |              |
| Unavailable                    | 45           | 4                | 3                   |             |              |
| <b>WHO grade</b>               |              |                  |                     |             |              |
| II                             | 254          | 109              | 122                 | 92          |              |
| III                            | 262          | 72               | 51                  | 71          |              |
| IV                             | 153          | 144              | 128                 | 181         |              |
| Unavailable                    | 28           | 0                | 5                   | 38          |              |

**Table S2:** The clinical information in the First Hospital of China Medical University

| Sample | Gender | Age | WHO Grade                         |
|--------|--------|-----|-----------------------------------|
| 1      | male   | 60  | III                               |
| 2      | male   | 35  | III                               |
| 3      | male   | 35  | Peri-tumor (paired with sample 2) |
| 4      | female | 55  | II                                |
| 5      | female | 49  | II                                |
| 6      | male   | 56  | IV                                |
| 7      | female | 65  | IV                                |
| 8      | female | 33  | IV                                |

**Table S3:** Pearson correlation of angiogenesis genes with HOXB5 in four datasets

| symbol   | TCGA RNA-Seq |          | CGGA RNA-Seq_325 |          | CGGA microarray_301 |          | REMBRANDT   |          |
|----------|--------------|----------|------------------|----------|---------------------|----------|-------------|----------|
|          | correlation  | pvalue   | correlation      | pvalue   | correlation         | pvalue   | correlation | pvalue   |
| VCAN     | -0.088       | 0.02017  | 0.063            | 0.255024 | 0.031               | 0.587202 | 0.012       | 0.819175 |
| POSTN    | 0.511        | 1.01E-47 | 0.472            | 2.07E-19 | 0.483               | 5.87E-19 | 0.298       | 2.87E-09 |
| FSTL1    | 0.487        | 9.76E-43 | 0.322            | 2.68E-09 | 0.449               | 2.26E-16 | 0.346       | 3.86E-12 |
| LRPAP1   | 0.193        | 2.65E-07 | 0.139            | 0.012184 | 0.037               | 0.520382 | 0.107       | 0.036021 |
| STC1     | 0.406        | 4.75E-29 | 0.321            | 3.33E-09 | 0.605               | 2.19E-31 | 0.351       | 1.78E-12 |
| LPL      | -0.091       | 0.016317 | -0.025           | 0.658036 | -0.048              | 0.40362  | 0.055       | 0.284115 |
| VEGFA    | 0.353        | 6.75E-22 | 0.278            | 3.55E-07 | 0.391               | 1.90E-12 | 0.300       | 2.45E-09 |
| PF4      | 0.047        | 0.219153 | 0.105            | 0.058305 | 0.219               | 0.000129 | 0.199       | 9.48E-05 |
| THBD     | 0.319        | 6.64E-18 | 0.265            | 1.24E-06 | 0.359               | 1.34E-10 | 0.164       | 0.001303 |
| FGFR1    | 0.319        | 6.10E-18 | 0.322            | 2.66E-09 | 0.263               | 3.63E-06 | 0.212       | 3.03E-05 |
| TNFRSF21 | -0.077       | 0.04218  | -0.088           | 0.112865 | -0.126              | 0.029199 | 0.047       | 0.364522 |
| CCND2    | 0.028        | 0.454034 | -0.014           | 0.807745 | -0.082              | 0.158162 | 0.201       | 8.10E-05 |
| COL5A2   | 0.467        | 4.99E-39 | 0.389            | 3.56E-13 | 0.527               | 5.96E-23 | 0.275       | 4.68E-08 |
| ITGAV    | 0.096        | 0.011606 | 0.085            | 0.127844 | -0.013              | 0.824622 | 0.011       | 0.82576  |
| SERPINA5 | 0.386        | 4.03E-26 | 0.191            | 0.000548 | 0.317               | 1.89E-08 | 0.180       | 0.000403 |
| KCNJ8    | 0.154        | 4.39E-05 | 0.195            | 0.000403 | 0.209               | 0.000269 | 0.123       | 0.016568 |
| APP      | 0.028        | 0.468352 | 0.039            | 0.481724 | -0.025              | 0.670518 | -0.023      | 0.65071  |
| COL3A1   | 0.455        | 7.51E-37 | 0.394            | 1.56E-13 | 0.510               | 2.72E-21 | 0.304       | 1.32E-09 |
| SPP1     | 0.255        | 8.15E-12 | 0.158            | 0.004298 | 0.177               | 0.002089 | 0.086       | 0.092358 |
| NRP1     | 0.393        | 3.92E-27 | 0.310            | 1.09E-08 | 0.431               | 4.99E-15 | 0.251       | 7.03E-07 |
| OLR1     | 0.108        | 0.004217 | 0.018            | 0.752411 | -0.059              | 0.306753 | -0.067      | 0.189846 |
| PDGFA    | 0.317        | 9.31E-18 | 0.248            | 5.83E-06 | 0.259               | 5.34E-06 | 0.296       | 3.96E-09 |
| PTK2     | -0.151       | 6.06E-05 | -0.108           | 0.05172  | -0.228              | 6.61E-05 | -0.341      | 7.47E-12 |
| SLCO2A1  | 0.309        | 7.77E-17 | 0.195            | 0.000402 | 0.158               | 0.005959 | 0.101       | 0.048105 |

|         |        |          |       |          |       |          |        |          |
|---------|--------|----------|-------|----------|-------|----------|--------|----------|
| PGLYRP1 | 0.093  | 0.013758 | 0.238 | 1.48E-05 | 0.439 | 1.31E-15 | 0.254  | 5.07E-07 |
| VAV2    | 0.014  | 0.712234 | 0.090 | 0.10347  | 0.207 | 0.000292 | 0.259  | 3.04E-07 |
| S100A4  | 0.413  | 4.72E-30 | 0.284 | 1.85E-07 | 0.403 | 3.51E-13 | 0.257  | 3.73E-07 |
| MSX1    | 0.179  | 1.96E-06 | 0.221 | 5.96E-05 | 0.136 | 0.017897 | 0.229  | 6.23E-06 |
| VTN     | -0.155 | 4.03E-05 | 0.034 | 0.540261 | 0.144 | 0.01267  | 0.044  | 0.394748 |
| TIMP1   | 0.475  | 1.58E-40 | 0.354 | 5.06E-11 | 0.358 | 1.66E-10 | 0.284  | 1.62E-08 |
| JAG2    | 0.028  | 0.461569 | 0.043 | 0.436632 | 0.006 | 0.913523 | -0.082 | 0.108443 |
| LUM     | 0.437  | 7.08E-34 | 0.395 | 1.37E-13 | 0.435 | 2.44E-15 | 0.230  | 5.53E-06 |
| CXCL6   | 0.290  | 5.53E-15 | 0.141 | 0.010688 | 0.366 | 5.85E-11 | 0.137  | 0.007377 |

**Figure S1: Validation in CGGA\_mRNA693 dataset**

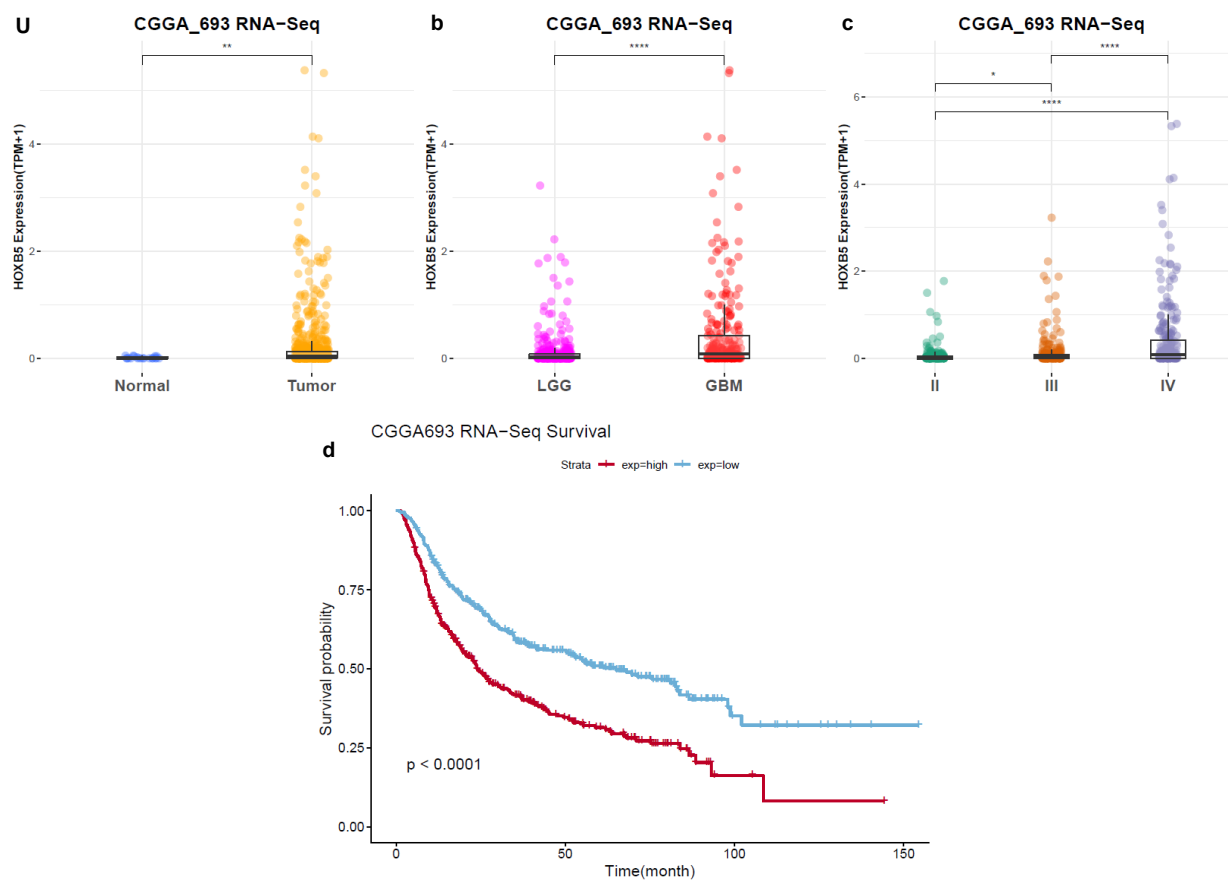

*HOXB5* expression level between glioma and normal brain samples(a), LGG and GBM(b), and with different grades(c);(d) Kaplan–Meier survival plots for *HOXB5*. (Wilcoxon, \*:  $p < 0.05$ ; \*\*:  $p < 0.01$ ; \*\*\*\*:  $p < 0.0001$ )
